# Supplementary material for: Two-step yielding behavior of densely packed microgel mixtures with chemically dissimilar surfaces and largely different sizes
Source: Royal Society of Chemistry journal article supplement (doi:10.1039/d0sm00366b), 2020-01-01
Supplement: d0sm00366b1.pdf [file d0sm00366b1.pdf]

## Supplementary Information

### Two-Step Yielding Behavior of Densely Packed Microgel Mixtures with Chemically Dissimilar Surfaces and Largely Different Sizes

Saori Minami,<sup>†</sup> Takumi Watanabe,<sup>‡</sup> Yuma Sasaki,<sup>‡</sup> Haruka Minato,<sup>‡</sup> Atsushi Yamamoto,<sup>†</sup>  
Daisuke Suzuki,<sup>\*,‡,¶</sup> and Kenji Urayama<sup>\*,†</sup>

<sup>†</sup> Department of Macromolecular Science and Engineering, Kyoto Institute of Technology,  
Sakyo-ku, Kyoto 606-8585, Japan

<sup>‡</sup> Graduate School of Textile Science & Technology, <sup>¶</sup> Research Initiative for Supra-Materials,  
Interdisciplinary Cluster for Cutting Edge Research, Shinshu University, Ueda 386-8567, Japan

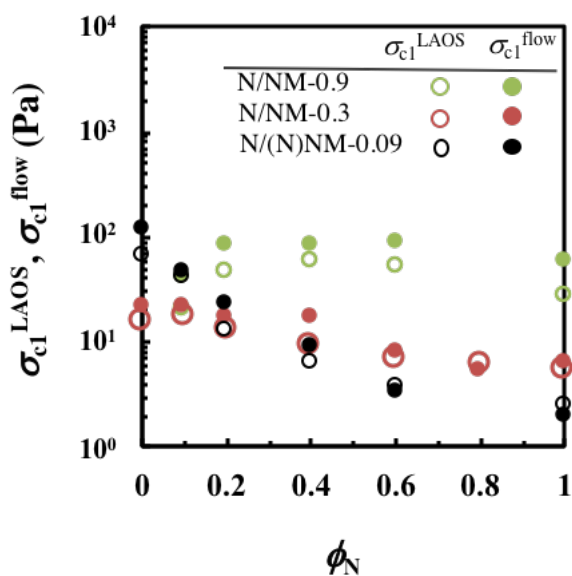

**Supporting information 1.**  $\sigma_{c1}^{LAOS}$  and  $\sigma_{c1}^{flow}$  as a function of  $\phi_N$  for N/NM-0.9, 0.3 and N/(N)NM-0.09. The values of  $\sigma_c$  determined from the two different methods (LAOS and steady flow measurements) agree well with each other.

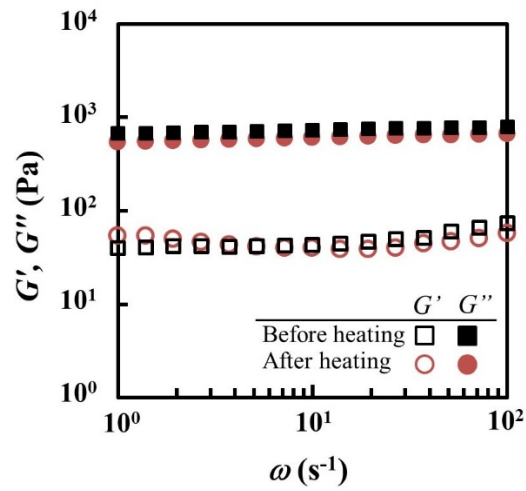

**Supporting Information 2.**  $\omega$  dependence of  $G'$  and  $G''$  in linear response regime for N/NM-0.3 with  $\phi_N = 0.4$  before and after the heating treatment. In the heating treatment, the specimen was heated to 55 °C in the shrunken state above the LCST, and then cooled to 25 °C in the swollen state. No appreciable difference in linear viscoelasticity before and after heating ensures that the packing at 25 °C corresponds to the equilibrium state.

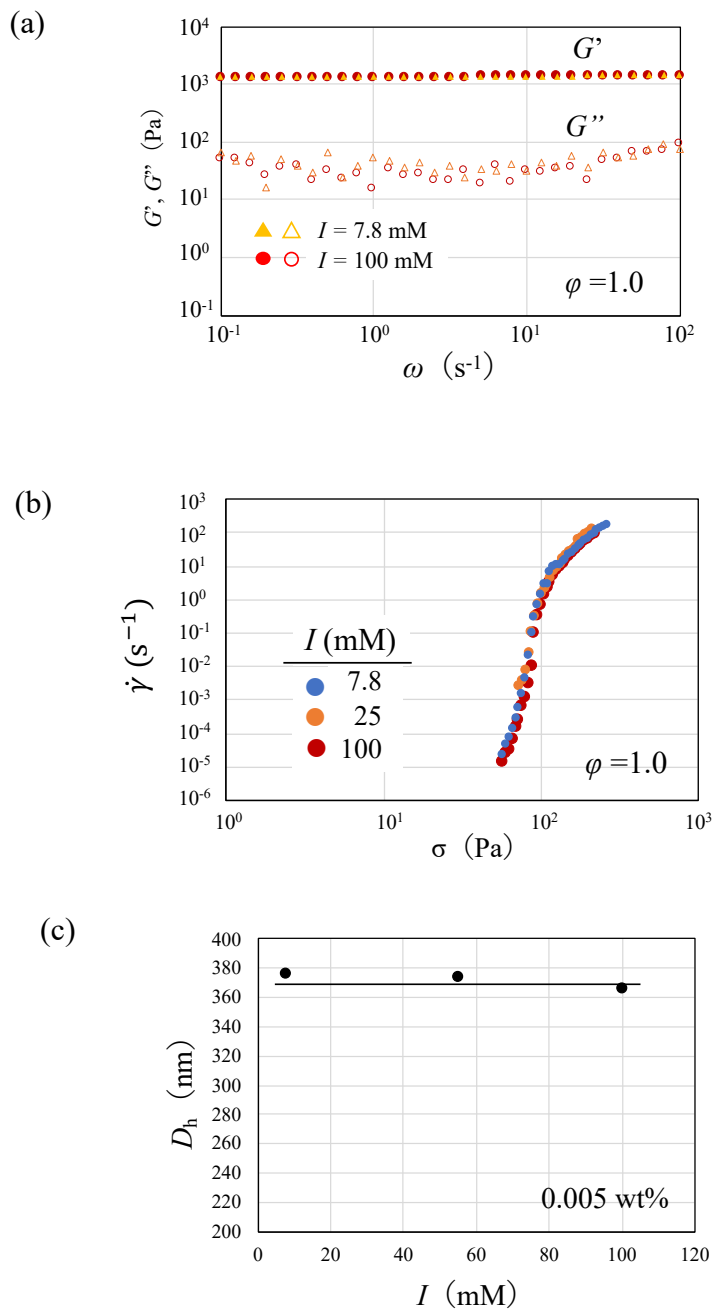

**Supporting Information 3.** Effect of ionic strength ( $I$ ) on (a) linear dynamic viscoelasticity, (b) steady state flow for the pastes ( $\phi = 1$ ) and (c) particle dimension using the N-microgels in which a finite amount (0.5 mol%) of fumaric acid at  $\text{pH} = 11$  ( $\gg \text{pKa}$  for Fac;  $\text{pKa}_1 = 3.1$  and  $\text{pKa}_2 = 4.4$ ) at  $25^\circ\text{C}$ . No appreciable effect of  $I$  is observed in (a)-(c).
